# Supplementary material for: Transcriptional dynamics and epigenetic regulation of E and ID protein encoding genes during human T cell development
Source: PubMed Central journal article supplement (PMC9366357; doi:10.3389/fimmu.2022.960918), 2022-07-28
Supplement: DataSheet_1.pdf [file DataSheet_1.pdf]

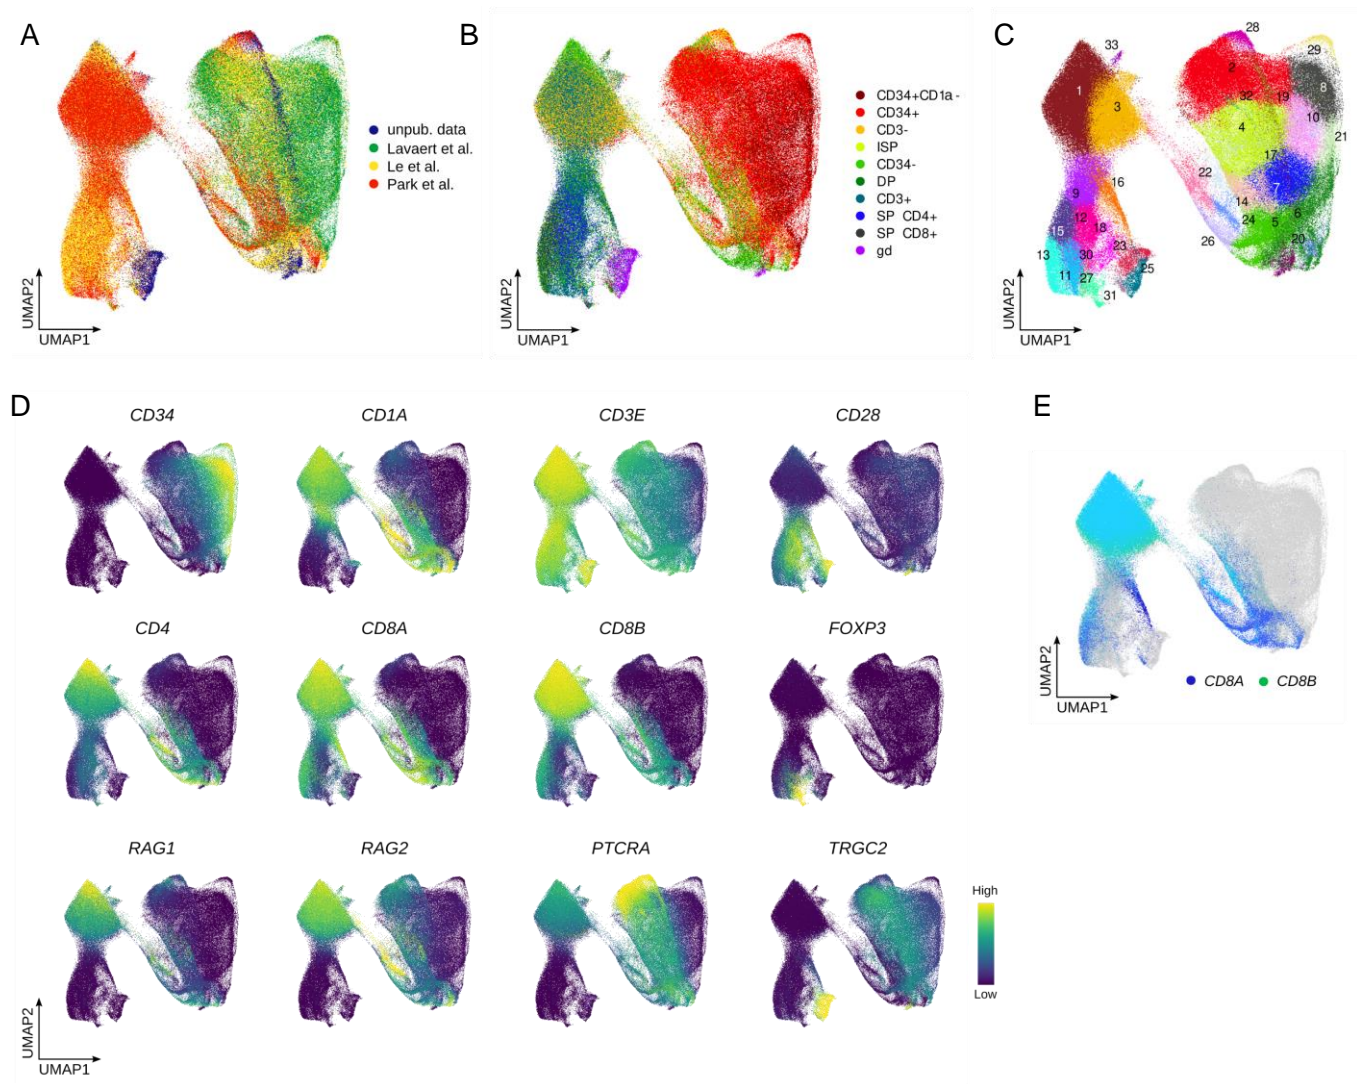

**Figure S1: Composition of the pediatric single cell data set.**

(A) UMAP visualization of thymocytes in the pediatric single cell data set by source. Note that the respective studies used enrichment methods to obtain different thymocytes subsets. (B) UMAP visualization of thymocytes in the pediatric single cell data set by enrichment strategy. (C) UMAP visualization of initially identified clusters in the pediatric single cell data set. Clusters with comparable expression of thymocyte marker genes were merged to form the larger annotated clusters used throughout the study (see Figure 1C). (D) UMAP visualizations of imputed expression of known thymocyte marker genes in the pediatric single cell data set. (E) UMAP visualization of transcription of *CD8A* vs. *CD8B* used to identify  $CD8\alpha^+$  thymocytes.

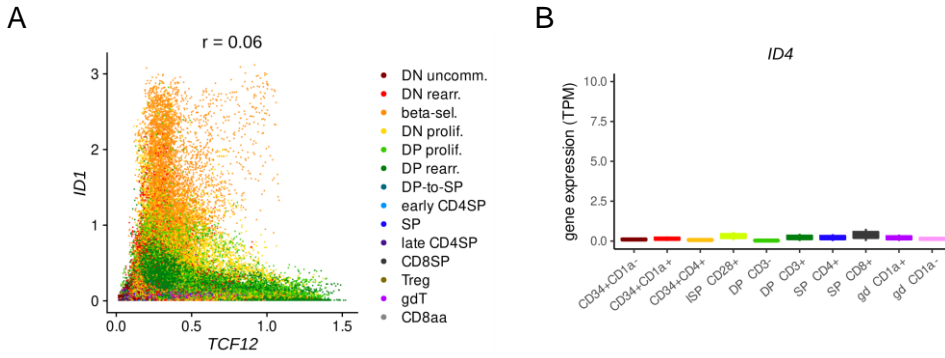

**Figure S2: *ID4* is not expressed in human thymocytes.**

(A) Scatter plot for imputed transcript levels of *ID1* and *TCF12* in thymocytes. Cells are colored by celltype and Pearson correlation coefficient is shown. (B) Transcript levels of *ID4* in human thymocytes according to bulk RNA-seq data.

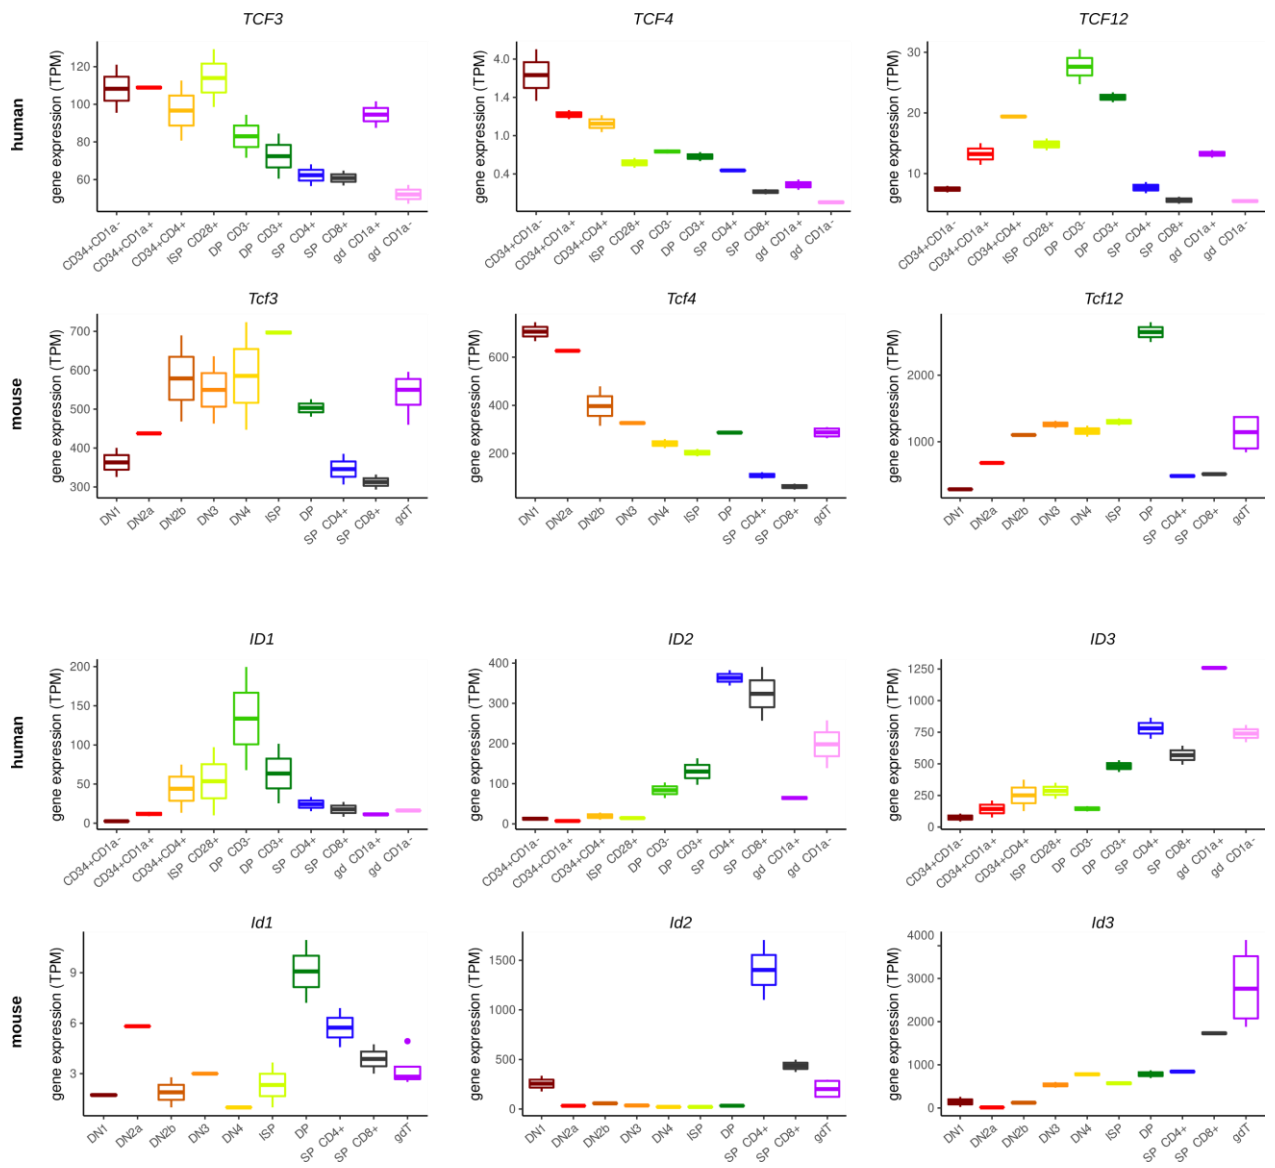

**Figure S3: E and ID protein encoding genes exhibit similar expression patterns in human and murine thymocytes.**

Transcript levels of E and ID protein genes according to bulk RNA-seq on human and mouse thymocytes. Mouse data was obtained from the ImmGen dataset repository as a normalized count table.

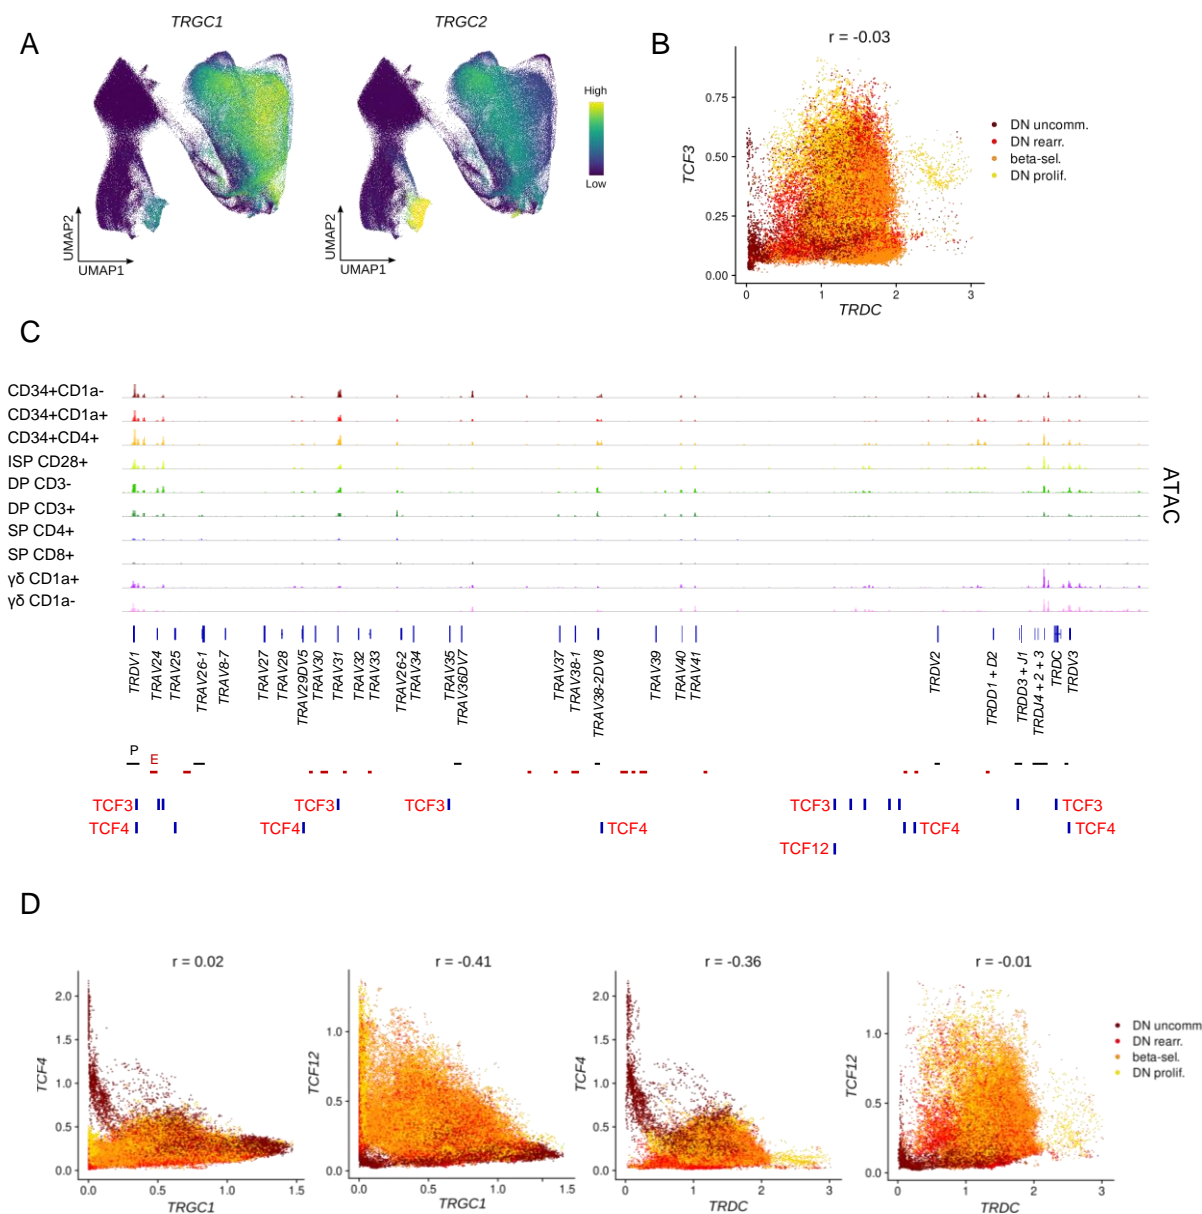

**Figure S4: *TRGC* expression in human thymocytes.**

(A) UMAP visualization of imputed *TRGC1* and *TRGC2* transcripts in pediatric thymocytes. (B) Scatter plot for imputed transcript levels of *TCF3* and *TRDC* in immature thymocytes. Cells are colored by celltype and Pearson correlation coefficient is shown. (C) Genome browser view of ATAC and E protein motifs at the *TCRD* locus. Locations of promoters (P) and enhancers (E) were retrieved from the Ensembl Regulatory Build and are indicated below in the gene structure. (D) Scatter plots for imputed transcript levels of *TCF4*, *TCF12*, *TRGC1* and *TRDC* in immature thymocytes. Cells are colored by celltype and Pearson correlation coefficient is shown.

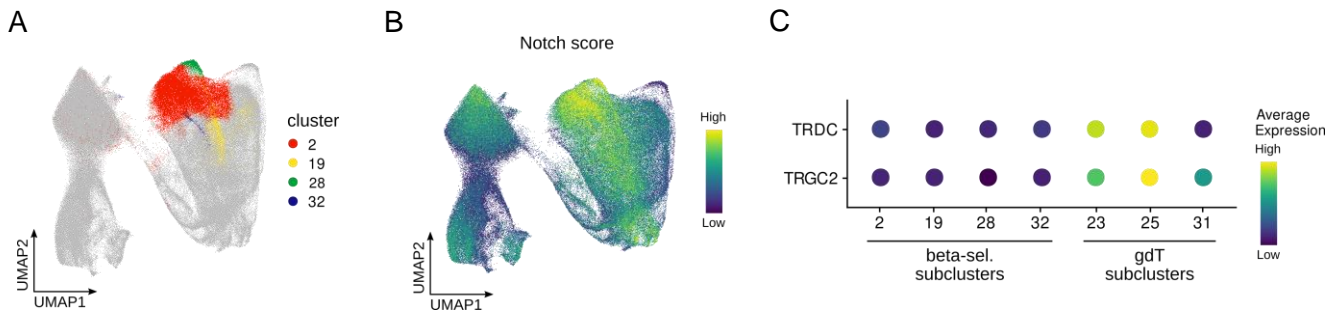

**Figure S5: Subclusters of  $\beta$ -selecting thymocytes.**

(A) UMAP visualization of originally identified clusters that were merged to form the  $\beta$ -selecting cluster based on similar expression of key thymocyte marker genes. (B) UMAP visualization of the Notch score determined based on the expression of known NOTCH signaling target genes. (C) Dot plot visualizing pseudo-bulk expression of *TRDC* and *TRGC2*. Imputed, gene-scaled expression is shown for all subclusters comprising the  $\beta$ -selecting and  $\gamma\delta$  T clusters.

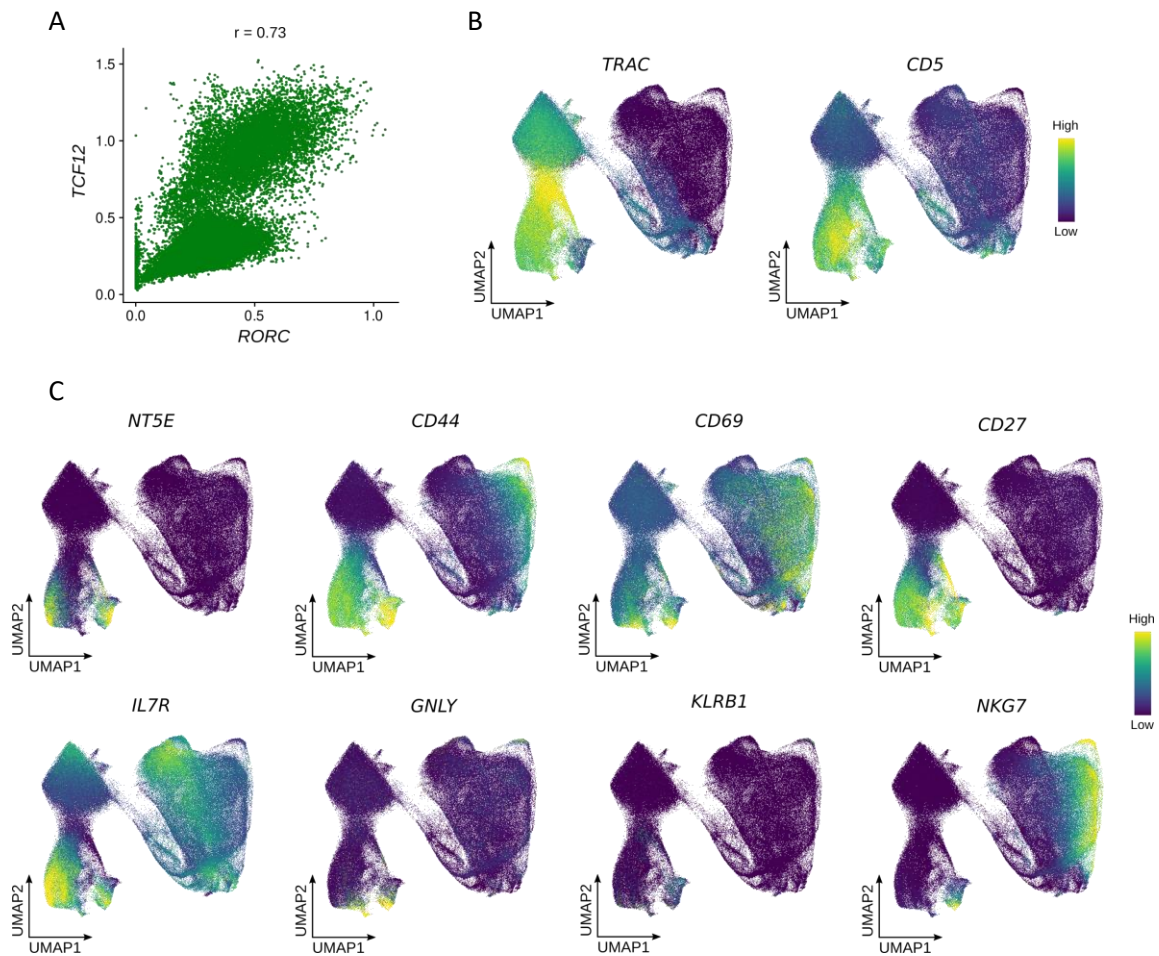

**Figure S6: Expression of *TCF12* and *RORC* is strongly correlated in rearranging DP thymocytes.**

(A) Scatter plot for imputed transcript levels of *TCF12* and *RORC* in rearranging DP thymocytes. Pearson correlation coefficient is shown. (B) UMAP visualization of imputed *TRAC* and *CD5* expression in pediatric thymocytes. (C) UMAP visualizations of imputed expression of known  $\gamma\delta$  T cell maturation genes in the pediatric single cell data set.

# Figure S7

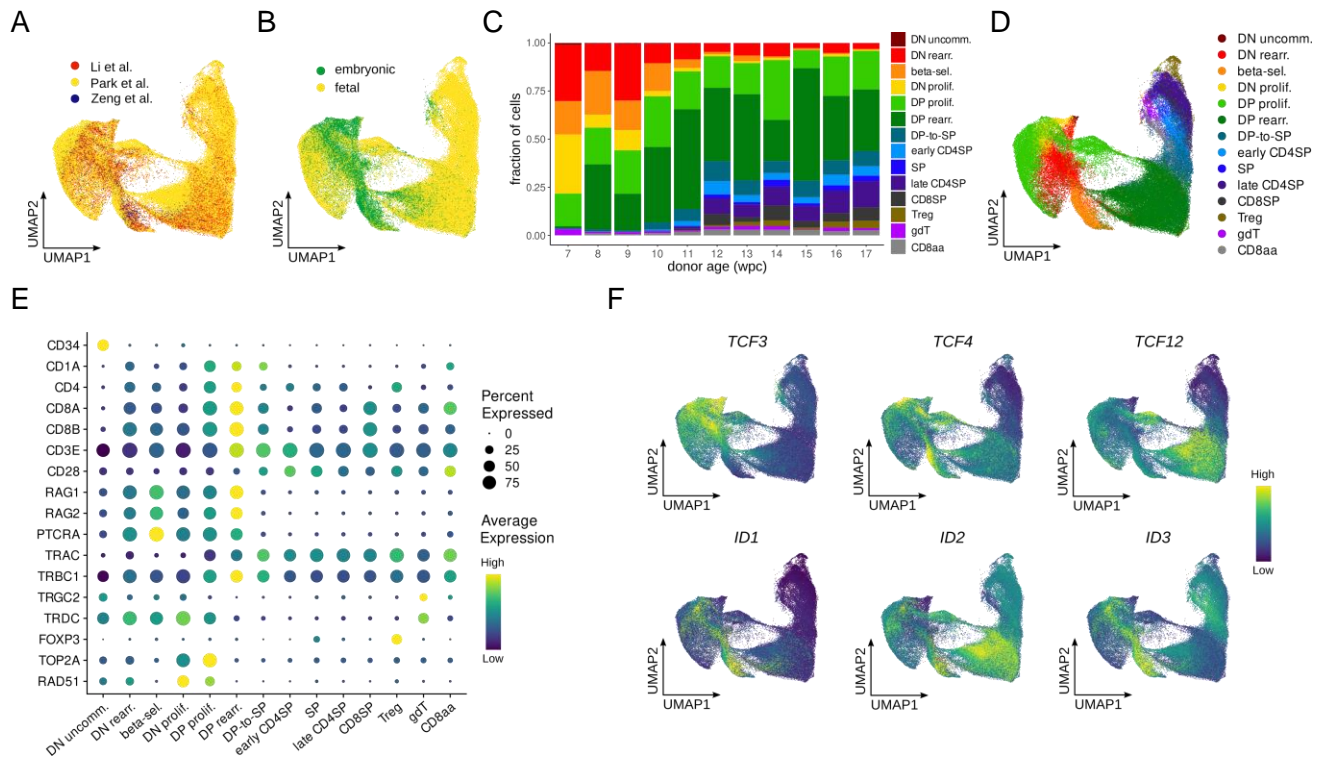

**Figure S7: Composition of the prenatal single cell data set.**

(A) UMAP visualization of thymocytes in the prenatal single cell data set by source. (B) UMAP visualization of thymocytes in the prenatal single cell data set by developmental stage. Embryonic:  $\leq 10$  wpc, fetal:  $>10$  wpc. (C) Stacked bargraph indicating the proportion of celltypes detected by age. (D) UMAP visualizing the annotated clusters in the prenatal single cell thymus data set after automated annotation based on the pediatric reference data. (E) Dot plot visualizing pseudo-bulk expression of known thymocyte markers per annotated cluster in the prenatal single cell data set. Non-imputed data was log-normalized, averaged and scaled by gene. (F) UMAP visualizing the imputed expression of E and ID protein encoding genes in the prenatal thymus.

**Table S1:** Overview of single cell libraries used in this paper.

| Unique identifier | Source         | Donor     | Age      | Dev. stage | Sex | Enrichment strategy | Database     | Accession info |
|-------------------|----------------|-----------|----------|------------|-----|---------------------|--------------|----------------|
| 5478STDY7935100   | Park et al.    | Park_1    | 9 wpc    | embryonic  | f   | total cells         | ArrayExpress | E-MTAB-8581    |
| FCAImmp7179369    | Park et al.    | Park_2    | 16 wpc   | fetal      | m   | CD45pos             | ArrayExpress | E-MTAB-8581    |
| FCAImmp7198432    | Park et al.    | Park_3    | 9 wpc    | embryonic  | f   | total cells         | ArrayExpress | E-MTAB-8581    |
| FCAImmp7198634    | Park et al.    | Park_4    | 11 wpc   | fetal      | m   | CD45pos             | ArrayExpress | E-MTAB-8581    |
| FCAImmp7277556    | Park et al.    | Park_5    | 17 wpc   | fetal      | f   | CD45pos             | ArrayExpress | E-MTAB-8581    |
| FCAImmp7277564    | Park et al.    | Park_6    | 14 wpc   | fetal      | m   | CD45pos             | ArrayExpress | E-MTAB-8581    |
| FCAImmp7292030    | Park et al.    | Park_5    | 17 wpc   | fetal      | f   | CD45pos             | ArrayExpress | E-MTAB-8581    |
| FCAImmp7292034    | Park et al.    | Park_6    | 14 wpc   | fetal      | m   | CD45pos             | ArrayExpress | E-MTAB-8581    |
| FCAImmp7528283    | Park et al.    | Park_7    | 13 wpc   | fetal      | m   | CD45pos             | ArrayExpress | E-MTAB-8581    |
| FCAImmp7528294    | Park et al.    | Park_7    | 13 wpc   | fetal      | m   | CD45pos             | ArrayExpress | E-MTAB-8581    |
| FCAImmp7555851    | Park et al.    | Park_8    | 16 wpc   | fetal      | f   | CD45pos             | ArrayExpress | E-MTAB-8581    |
| FCAImmp7555860    | Park et al.    | Park_8    | 16 wpc   | fetal      | f   | CD45pos             | ArrayExpress | E-MTAB-8581    |
| FCAImmp7579218    | Park et al.    | Park_9    | 12 wpc   | fetal      | f   | CD45pos             | ArrayExpress | E-MTAB-8581    |
| FCAImmp7579230    | Park et al.    | Park_9    | 12 wpc   | fetal      | f   | CD45pos             | ArrayExpress | E-MTAB-8581    |
| FCAImmp7851890    | Park et al.    | Park_10   | 11 wpc   | fetal      | m   | total cells         | ArrayExpress | E-MTAB-8581    |
| FCAImmp7851891    | Park et al.    | Park_10   | 11 wpc   | fetal      | m   | total cells         | ArrayExpress | E-MTAB-8581    |
| FCAImmp7851892    | Park et al.    | Park_11   | 12 wpc   | fetal      | f   | total cells         | ArrayExpress | E-MTAB-8581    |
| FCAImmp7851893    | Park et al.    | Park_11   | 12 wpc   | fetal      | f   | total cells         | ArrayExpress | E-MTAB-8581    |
| FCAImmp7851894    | Park et al.    | Park_11   | 12 wpc   | fetal      | f   | total cells         | ArrayExpress | E-MTAB-8581    |
| FCAImmp7851895    | Park et al.    | Park_11   | 12 wpc   | fetal      | f   | total cells         | ArrayExpress | E-MTAB-8581    |
| WSS8084742        | Park et al.    | Park_12   | 7 wpc    | embryonic  | f   | total cells         | ArrayExpress | E-MTAB-8581    |
| WSS8084743        | Park et al.    | Park_12   | 7 wpc    | embryonic  | f   | total cells         | ArrayExpress | E-MTAB-8581    |
| WSS8084744        | Park et al.    | Park_13   | 8 wpc    | embryonic  | m   | total cells         | ArrayExpress | E-MTAB-8581    |
| WSS8084745        | Park et al.    | Park_13   | 8 wpc    | embryonic  | m   | total cells         | ArrayExpress | E-MTAB-8581    |
| GSM3906003        | Zeng et al.    | Zeng_1    | 8 wpc    | embryonic  | f   | CD235aneg           | GEO          | GSE133341      |
| GSM3906005        | Zeng et al.    | Zeng_2    | 9 wpc    | embryonic  | m   | CD235aneg           | GEO          | GSE133341      |
| GSM3906004        | Zeng et al.    | Zeng_3    | 10 wpc   | embryonic  | m   | CD235aneg           | GEO          | GSE133341      |
| OER087534         | Li et al.      | Li_1      | 11 wpc   | fetal      | m   | 7-AADneg            | NODE         | OEP001185      |
| OER087535         | Li et al.      | Li_2      | 15 wpc   | fetal      | m   | 7-AADneg            | NODE         | OEP001185      |
| OER087536         | Li et al.      | Li_3      | 13 wpc   | fetal      | m   | 7-AADneg            | NODE         | OEP001185      |
| OER087537         | Li et al.      | Li_4      | 9 wpc    | embryonic  | m   | 7-AADneg            | NODE         | OEP001185      |
| LMB1              | This paper     | Boehme_1  | 4 m      | pediatric  | m   | DP                  | GEO          | GSE205439      |
| LMB2              | This paper     | Boehme_1  | 4 m      | pediatric  | m   | CD34pos             | GEO          | GSE205439      |
| LMB3              | This paper     | Boehme_1  | 4 m      | pediatric  | m   | gd                  | GEO          | GSE205439      |
| LMB4              | This paper     | Boehme_1  | 4 m      | pediatric  | m   | ISP                 | GEO          | GSE205439      |
| SRR10302342       | Le et al.      | Le_1      | 1 y 7m   | pediatric  | m   | CD34pos             | GEO          | GSE139042      |
| SRR10302343       | Le et al.      | Le_1      | 1 y 7m   | pediatric  | m   | CD34pos             | GEO          | GSE139042      |
| SRR10302344       | Le et al.      | Le_1      | 1 y 7m   | pediatric  | m   | CD34neg             | GEO          | GSE139042      |
| SRR10302345       | Le et al.      | Le_1      | 1 y 7m   | pediatric  | m   | CD34neg             | GEO          | GSE139042      |
| SRR11680329       | Le et al.      | Le_2      | 1 y 11m  | pediatric  | m   | CD34pos             | GEO          | GSE139042      |
| SRR11680330       | Le et al.      | Le_2      | 1 y 11m  | pediatric  | m   | CD34pos             | GEO          | GSE139042      |
| SRR11680331       | Le et al.      | Le_2      | 1 y 11m  | pediatric  | m   | CD34pos             | GEO          | GSE139042      |
| SRR11680332       | Le et al.      | Le_2      | 1 y 11m  | pediatric  | m   | CD34pos             | GEO          | GSE139042      |
| SRR11680333       | Le et al.      | Le_3      | 9 d      | pediatric  | m   | CD34pos             | GEO          | GSE139042      |
| SRR11680334       | Le et al.      | Le_3      | 9 d      | pediatric  | m   | CD34pos             | GEO          | GSE139042      |
| SRR11680335       | Le et al.      | Le_3      | 9 d      | pediatric  | m   | CD34pos             | GEO          | GSE139042      |
| SRR11680336       | Le et al.      | Le_3      | 9 d      | pediatric  | m   | CD34neg             | GEO          | GSE139042      |
| SRR11680337       | Le et al.      | Le_3      | 9 d      | pediatric  | m   | CD34neg             | GEO          | GSE139042      |
| SRR11680338       | Le et al.      | Le_3      | 9 d      | pediatric  | m   | CD34neg             | GEO          | GSE139042      |
| SRR11680345       | Le et al.      | Le_4      | 5 y      | pediatric  | f   | CD34neg             | GEO          | GSE139042      |
| SRR11680346       | Le et al.      | Le_4      | 5 y      | pediatric  | f   | CD34neg             | GEO          | GSE139042      |
| SRR11680347       | Le et al.      | Le_4      | 5 y      | pediatric  | f   | CD34neg             | GEO          | GSE139042      |
| SRR11680348       | Le et al.      | Le_4      | 5 y      | pediatric  | f   | CD4SP               | GEO          | GSE139042      |
| SRR11680349       | Le et al.      | Le_4      | 5 y      | pediatric  | f   | CD4SP               | GEO          | GSE139042      |
| SRR11680350       | Le et al.      | Le_4      | 5 y      | pediatric  | f   | CD4SP               | GEO          | GSE139042      |
| SRR11680351       | Le et al.      | Le_4      | 5 y      | pediatric  | f   | CD8SP               | GEO          | GSE139042      |
| SRR11680352       | Le et al.      | Le_4      | 5 y      | pediatric  | f   | CD8SP               | GEO          | GSE139042      |
| SRR11680353       | Le et al.      | Le_4      | 5 y      | pediatric  | f   | CD8SP               | GEO          | GSE139042      |
| S1                | Lavaert et al. | Lavaert_1 | 5 m      | pediatric  | f   | CD34posCD1Aneg      | GEO          | GSE144870      |
| S2                | Lavaert et al. | Lavaert_2 | 5 m      | pediatric  | m   | CD34posCD1Aneg      | GEO          | GSE144870      |
| S3                | Lavaert et al. | Lavaert_3 | 6 m      | pediatric  | f   | CD34posCD1Aneg      | GEO          | GSE144870      |
| CISE10            | Lavaert et al. | Lavaert_1 | 5 m      | pediatric  | f   | CD34pos             | GEO          | GSE144870      |
| CISE11            | Lavaert et al. | Lavaert_2 | 5 m      | pediatric  | m   | CD34pos             | GEO          | GSE144870      |
| TTA15             | Lavaert et al. | Lavaert_4 | 1 y 2 m  | pediatric  | m   | CD34pos             | GEO          | GSE144870      |
| TTA16             | Lavaert et al. | Lavaert_5 | 9 m      | pediatric  | m   | CD34pos             | GEO          | GSE144870      |
| TTA7              | Park et al.    | Park_14   | 1 y 2 m  | pediatric  | m   | CD3neg              | GEO          | GSE206710      |
| TTA8              | Park et al.    | Park_14   | 1 y 2 m  | pediatric  | m   | CD3neg              | GEO          | GSE206710      |
| TTA9              | Park et al.    | Park_14   | 1 y 2 m  | pediatric  | m   | CD3pos              | GEO          | GSE206710      |
| TTA10             | Park et al.    | Park_14   | 1 y 2 m  | pediatric  | m   | CD3pos              | GEO          | GSE206710      |
| TTA11             | Park et al.    | Park_15   | 13 y 4 m | pediatric  | m   | CD3neg              | GEO          | GSE206710      |
| TTA12             | Park et al.    | Park_15   | 13 y 4 m | pediatric  | m   | CD3pos              | GEO          | GSE206710      |
| TTA13             | Park et al.    | Park_16   | 6 m      | pediatric  | m   | CD3neg              | GEO          | GSE206710      |
| TTA14             | Park et al.    | Park_16   | 6 m      | pediatric  | m   | CD3pos              | GEO          | GSE206710      |
